# Supplementary material
Source: PubMed Central journal article supplement (PMC3080128)
Supplement: NIHMS262427-supplement-01.pdf [file NIHMS262427-supplement-01.pdf]

### Supplemental Information

**Table S1.** Complete data of day 1 forced swim test, binned by 5 minutes. Rats received injections of GFP ( $n = 12$ ) or 1B/GFP ( $n = 11$ ) viral vector into caudal DRN. Data indicates mean counts  $\pm$  SEM of behavior. Note: one animal in the GFP group had an unusually high number of swimming counts during minutes 11-15, which was over 3 standard deviations outside of the mean for that group. Results with and without the outlier rat are included.

|                       | <b>GFP</b>                                                           | <b>1B/GFP</b>    |
|-----------------------|----------------------------------------------------------------------|------------------|
| Climbing, min 1-5     | 13.00 $\pm$ 1.05                                                     | 13.18 $\pm$ 1.24 |
| Climbing, min 6-10    | 1.17 $\pm$ 0.62                                                      | 0.09 $\pm$ 0.09  |
| Climbing, min 11-15   | 0.08 $\pm$ 0.08 (all animals)<br>0.00 $\pm$ 0.00 (outlier removed)   | 0.09 $\pm$ 0.09  |
| Swimming, min 1-5     | 11.83 $\pm$ 1.36                                                     | 21.91 $\pm$ 1.65 |
| Swimming, min 6-10    | 4.17 $\pm$ 1.13                                                      | 6.18 $\pm$ 1.17  |
| Swimming, min 11-15   | 2.58 $\pm$ 1.90 (all animals)<br>0.73 $\pm$ 0.45 (outlier removed)   | 1.55 $\pm$ 0.34  |
| Immobility, min 1-5   | 33.50 $\pm$ 1.72                                                     | 22.91 $\pm$ 2.35 |
| Immobility, min 6-10  | 54.67 $\pm$ 1.28                                                     | 53.73 $\pm$ 1.18 |
| Immobility, min 11-15 | 57.33 $\pm$ 1.98 (all animals)<br>59.27 $\pm$ 0.45 (outlier removed) | 58.36 $\pm$ 0.41 |

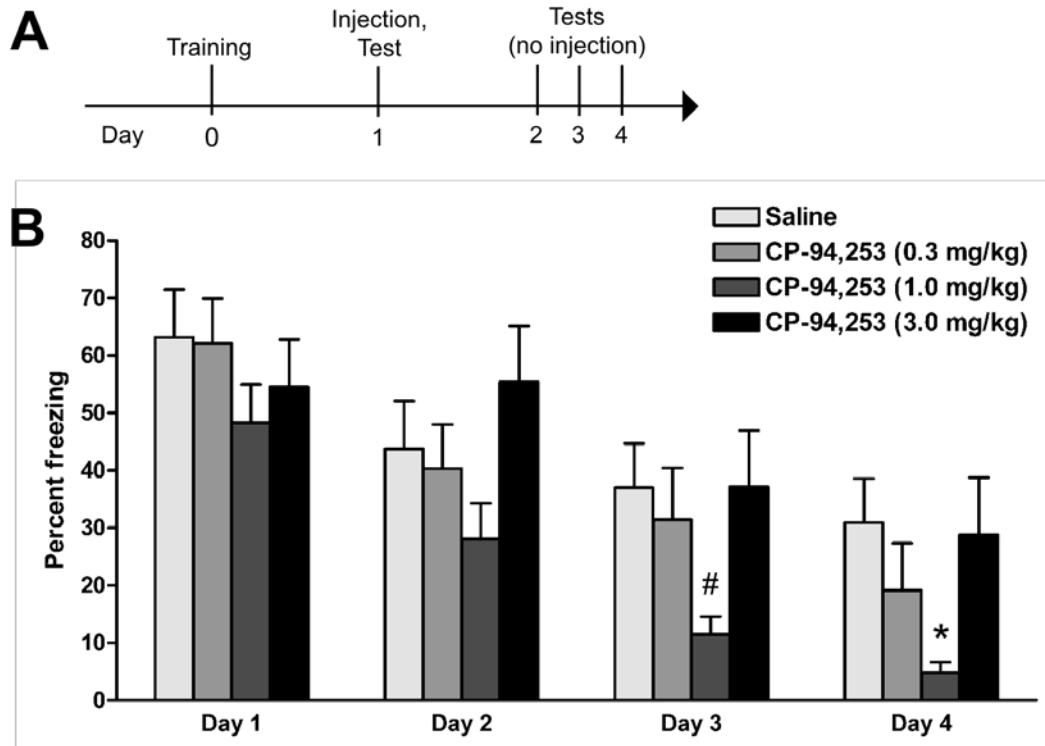

**Figure S1.** CP-94,253 dose-dependently reduces conditioned fear. **(A)** Animals were trained in contextual fear conditioning with two 0.7 mA 1 sec footshocks, and assigned to groups with balanced post-shock freezing [ $F(3,46) = 0.11, p = 0.99$ ]. Twenty-four h later (Day 1), rats were injected with saline or CP-94,253 ( $n = 11-12$  per group) 30 min prior to a test of conditioned fear. For 3 subsequent days (Days 2-4), rats were retested without injection.

**(B)** Mean  $\pm$ SEM percent of observations that rats spent freezing during 8 min tests of conditioned fear. Analysis of freezing with 2-way repeated measures ANOVA revealed a significant interaction between drug and day [ $F(9,129) = 1.96, p = 0.049$ ].

#  $p = 0.062$ ; \*  $p < 0.05$  vs. saline.
